# Supplementary material for: Synthesis and Thermophysical Characterization of Fatty Amides for Thermal Energy Storage
Source: MDPI journal article supplement (doi:10.3390/molecules24203777), 2019-10-21

**SUPPLEMENTARY MATERIAL**

**SYNTHESIS AND THERMOPHYSICAL  
CHARACTERIZATION OF FATTY AMIDES FOR  
THERMAL ENERGY STORAGE**

**INDEX**

|                                                       |            |
|-------------------------------------------------------|------------|
| <b>GENERAL SCHEME (SYNTHETIC PROCESS)</b>             | <b>S2</b>  |
| <b>THERMOPHYSICAL CHARAXTERIZATION (DSC response)</b> | <b>S3</b>  |
| <b>FT-IR SPECTRA</b>                                  | <b>S11</b> |
| <b>NMR SPECTRA</b>                                    | <b>S13</b> |

## GENERAL SCHEME (SYNTHETIC PROCESS)

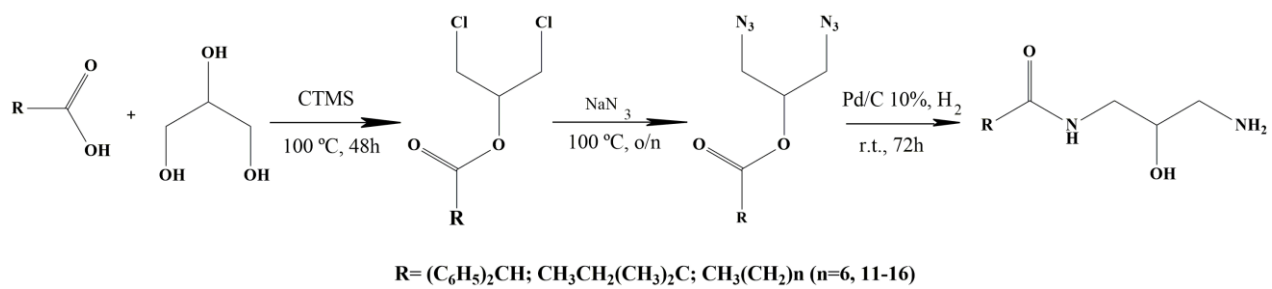

## THERMOPHYSICAL CHARACTERIZATION (DSC response)

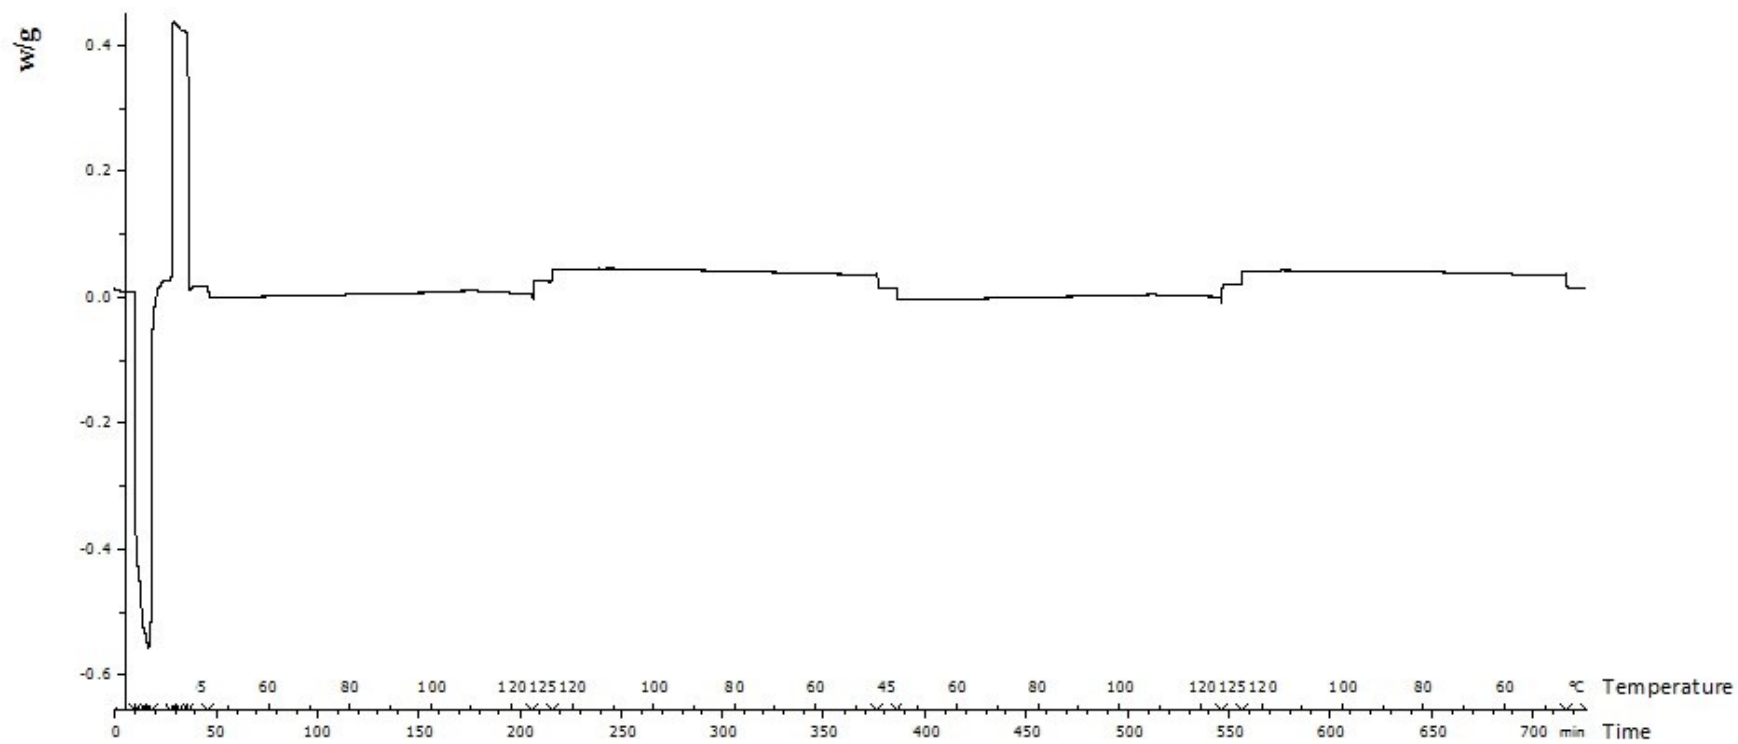

**Figure 1.** DSC response and evaluation of monoamide **2b**.

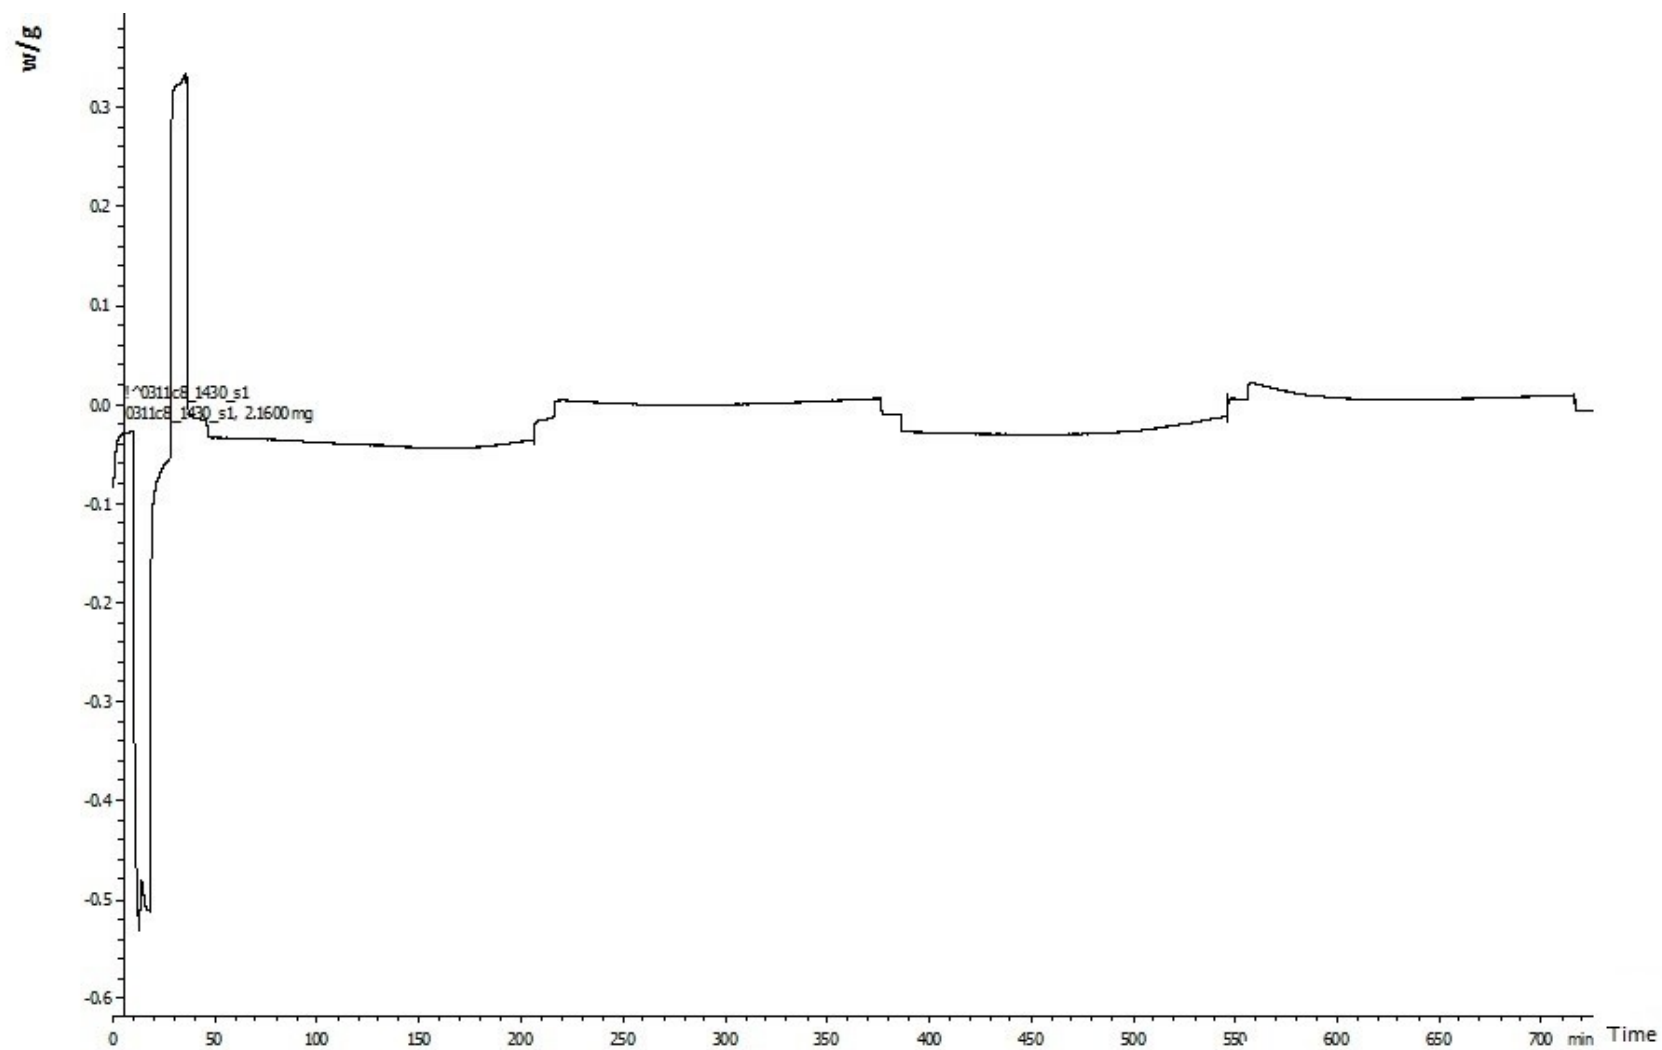

**Figure 2.** DSC response and evaluation of monoamide **2c**.

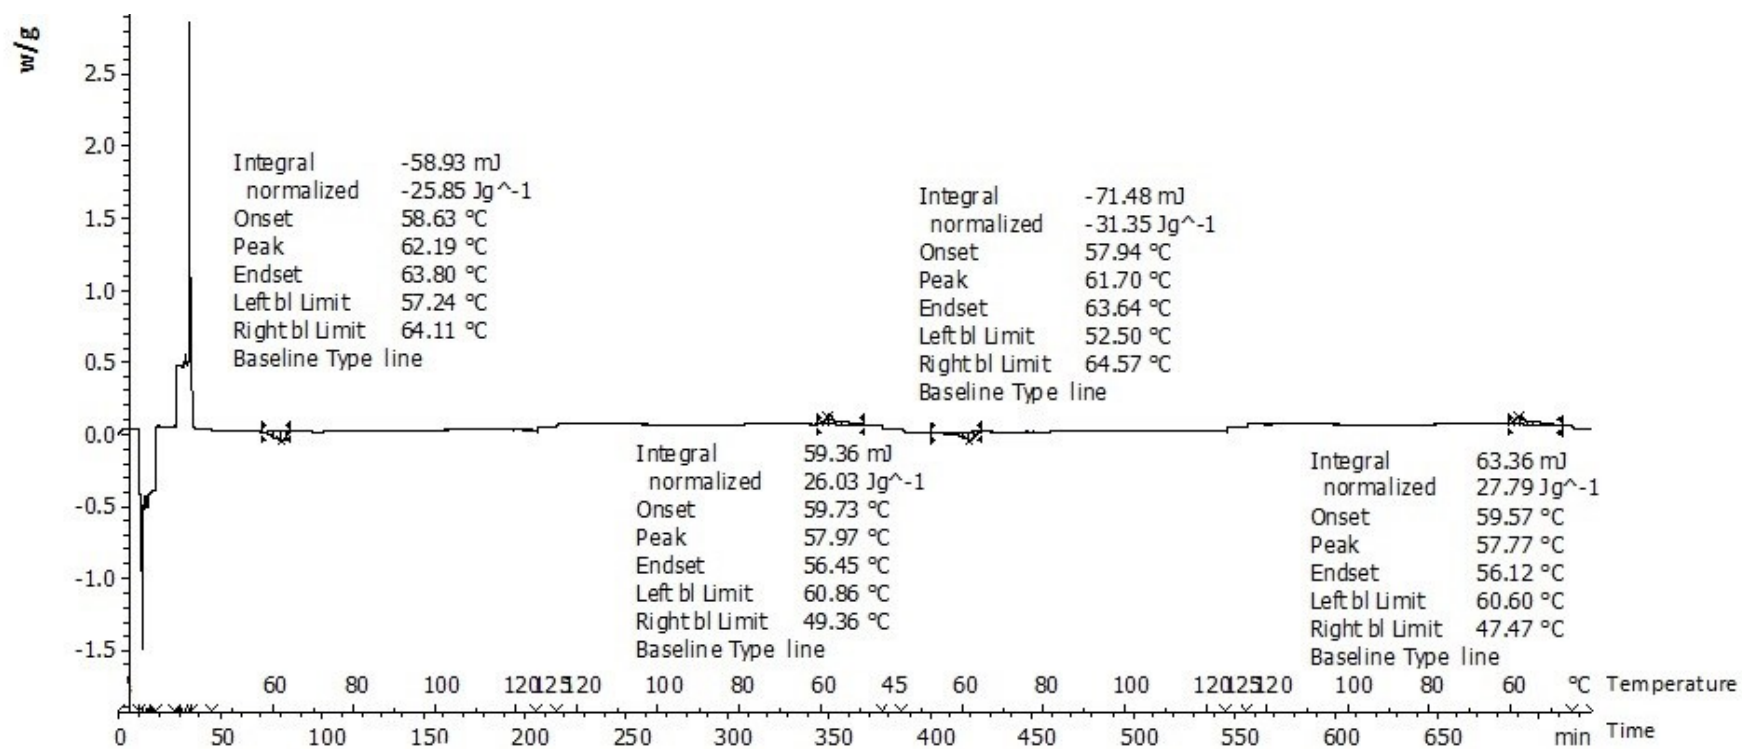

**Figure 3.** DSC response and evaluation of monoamide 2d.

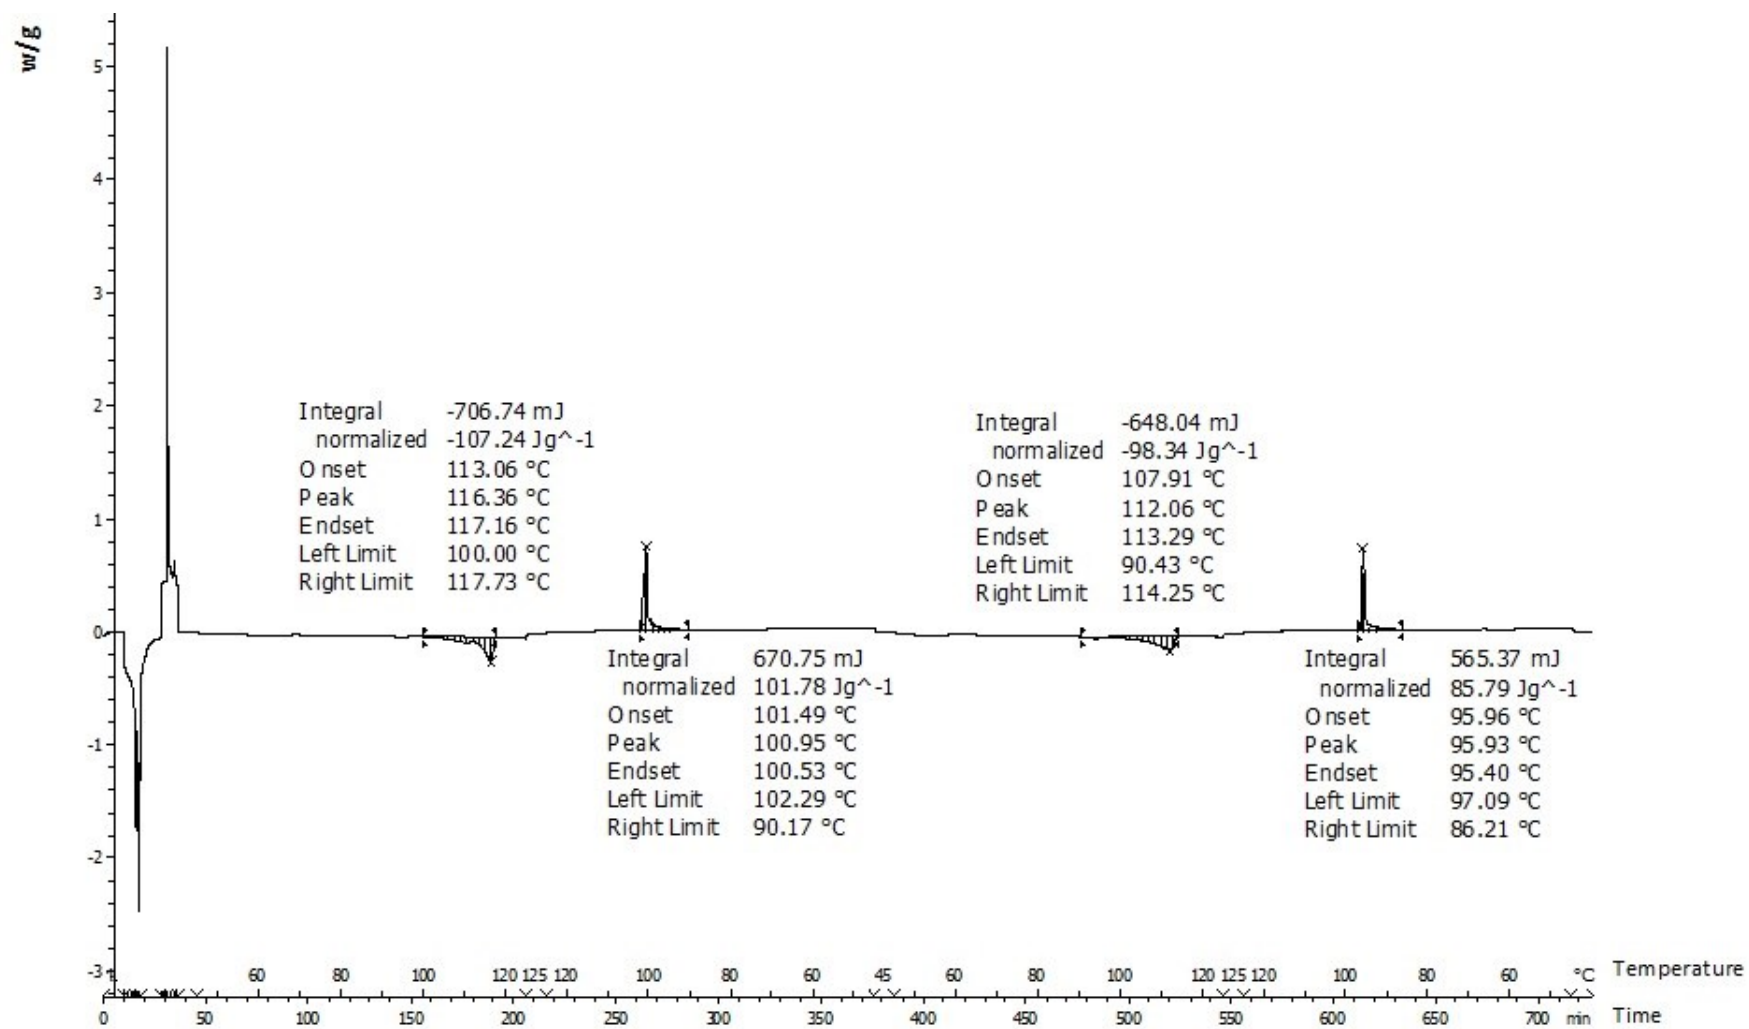

**Figure 4.** DSC response and evaluation of monoamide **2e**.

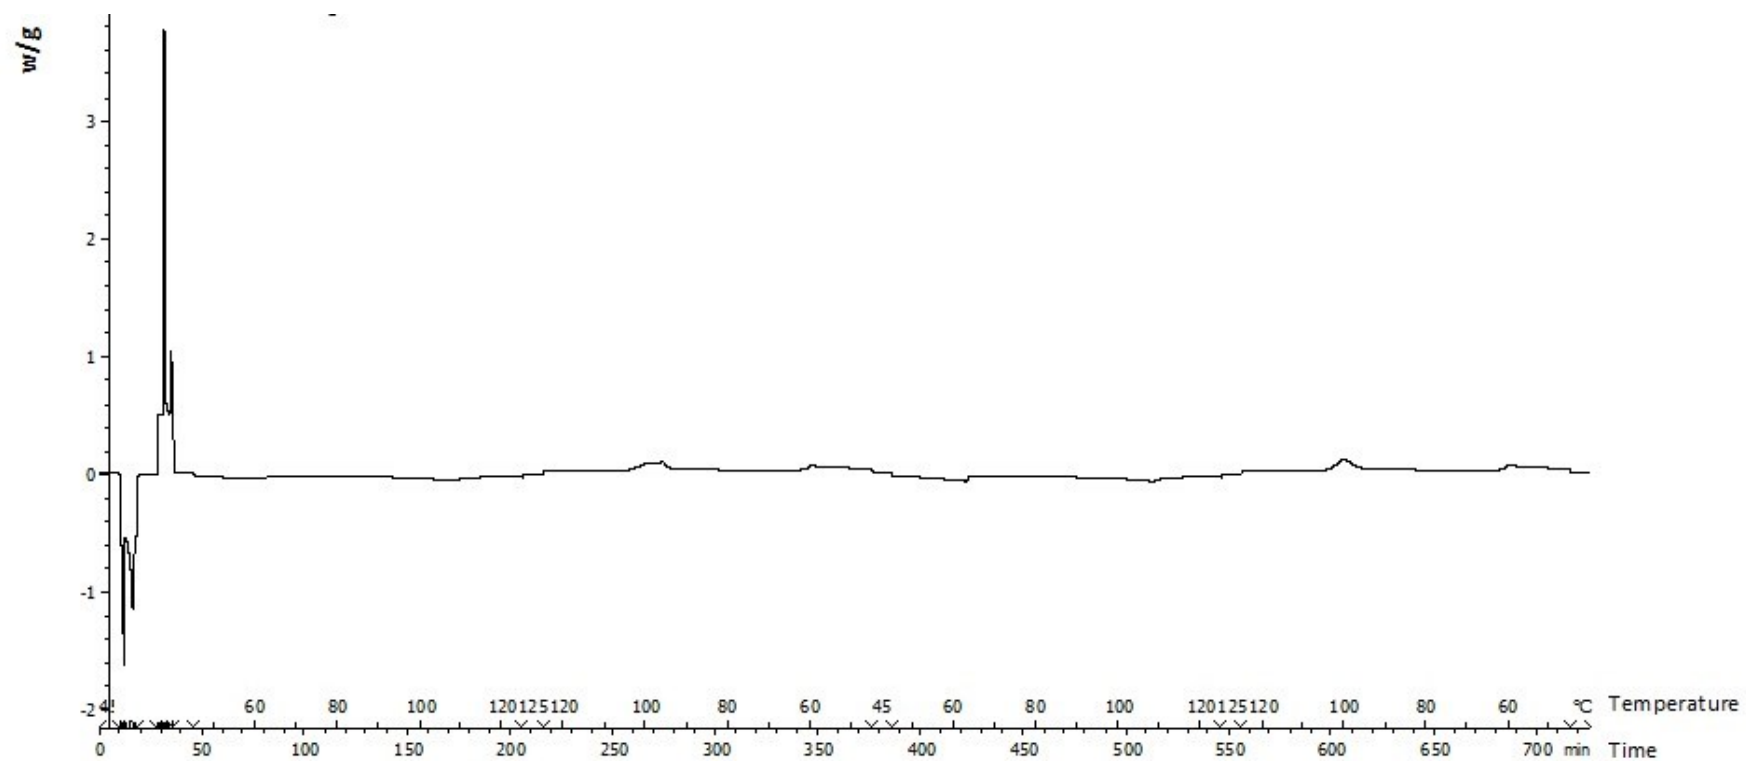

**Figure 5.** DSC response and evaluation of monoamide 2f.

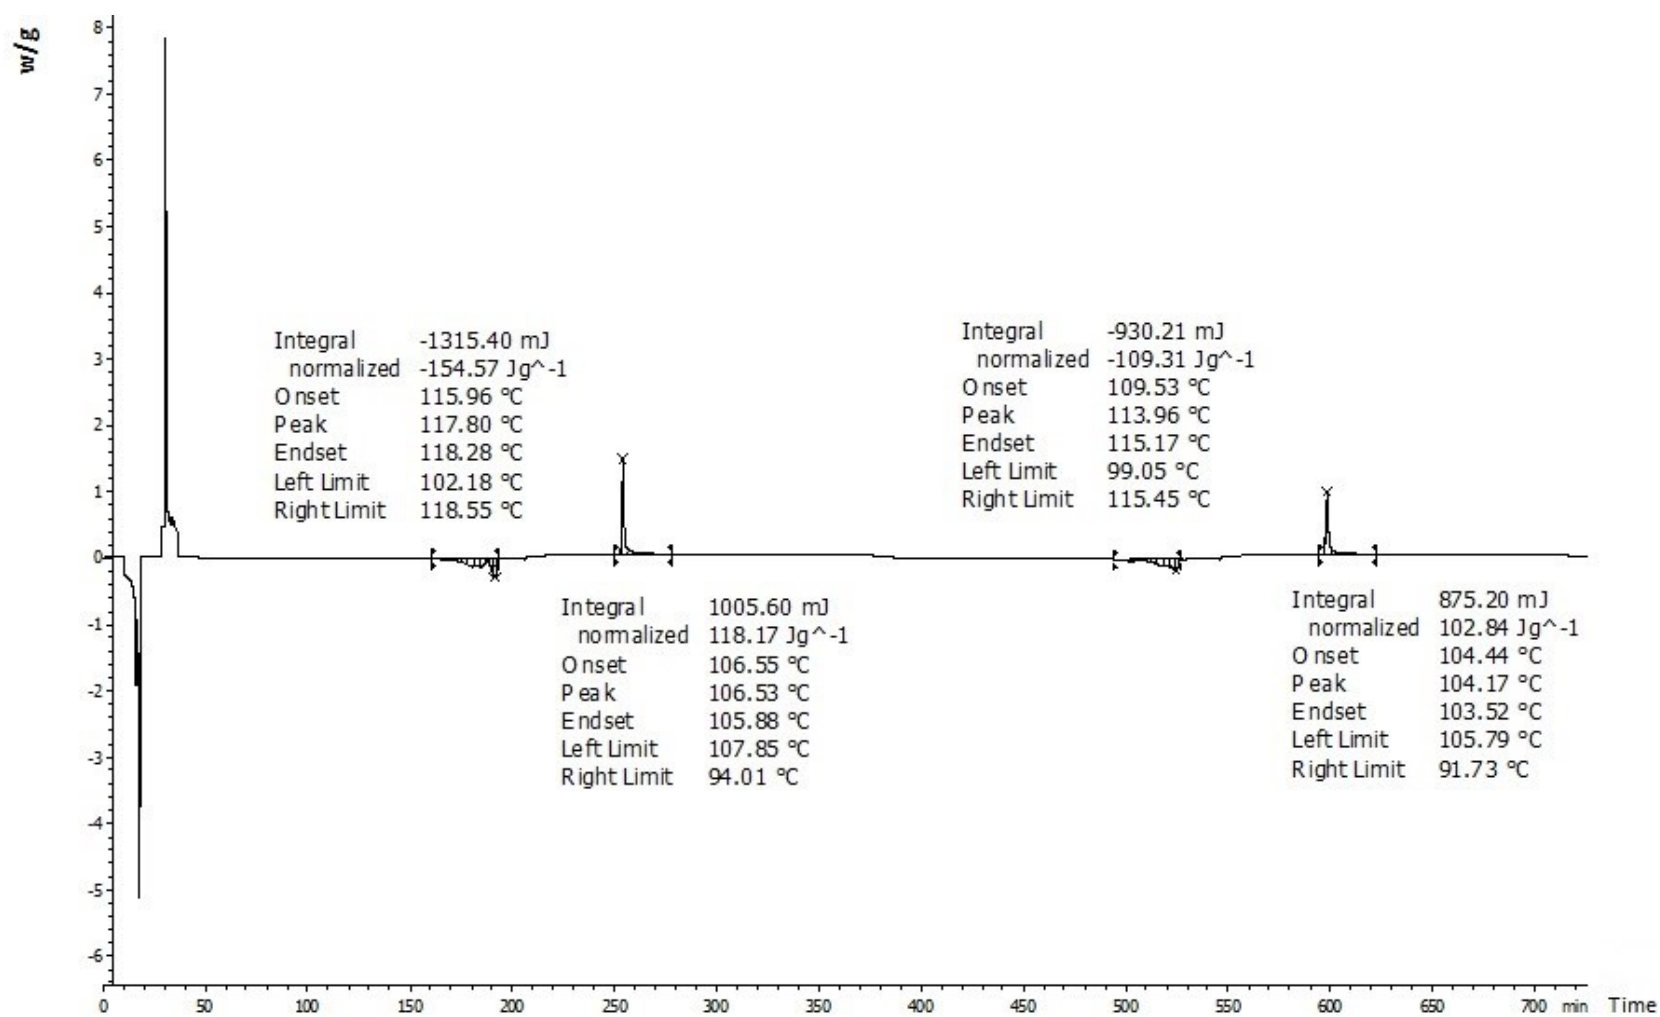

**Figure 6.** DSC response and evaluation of monoamide 2g



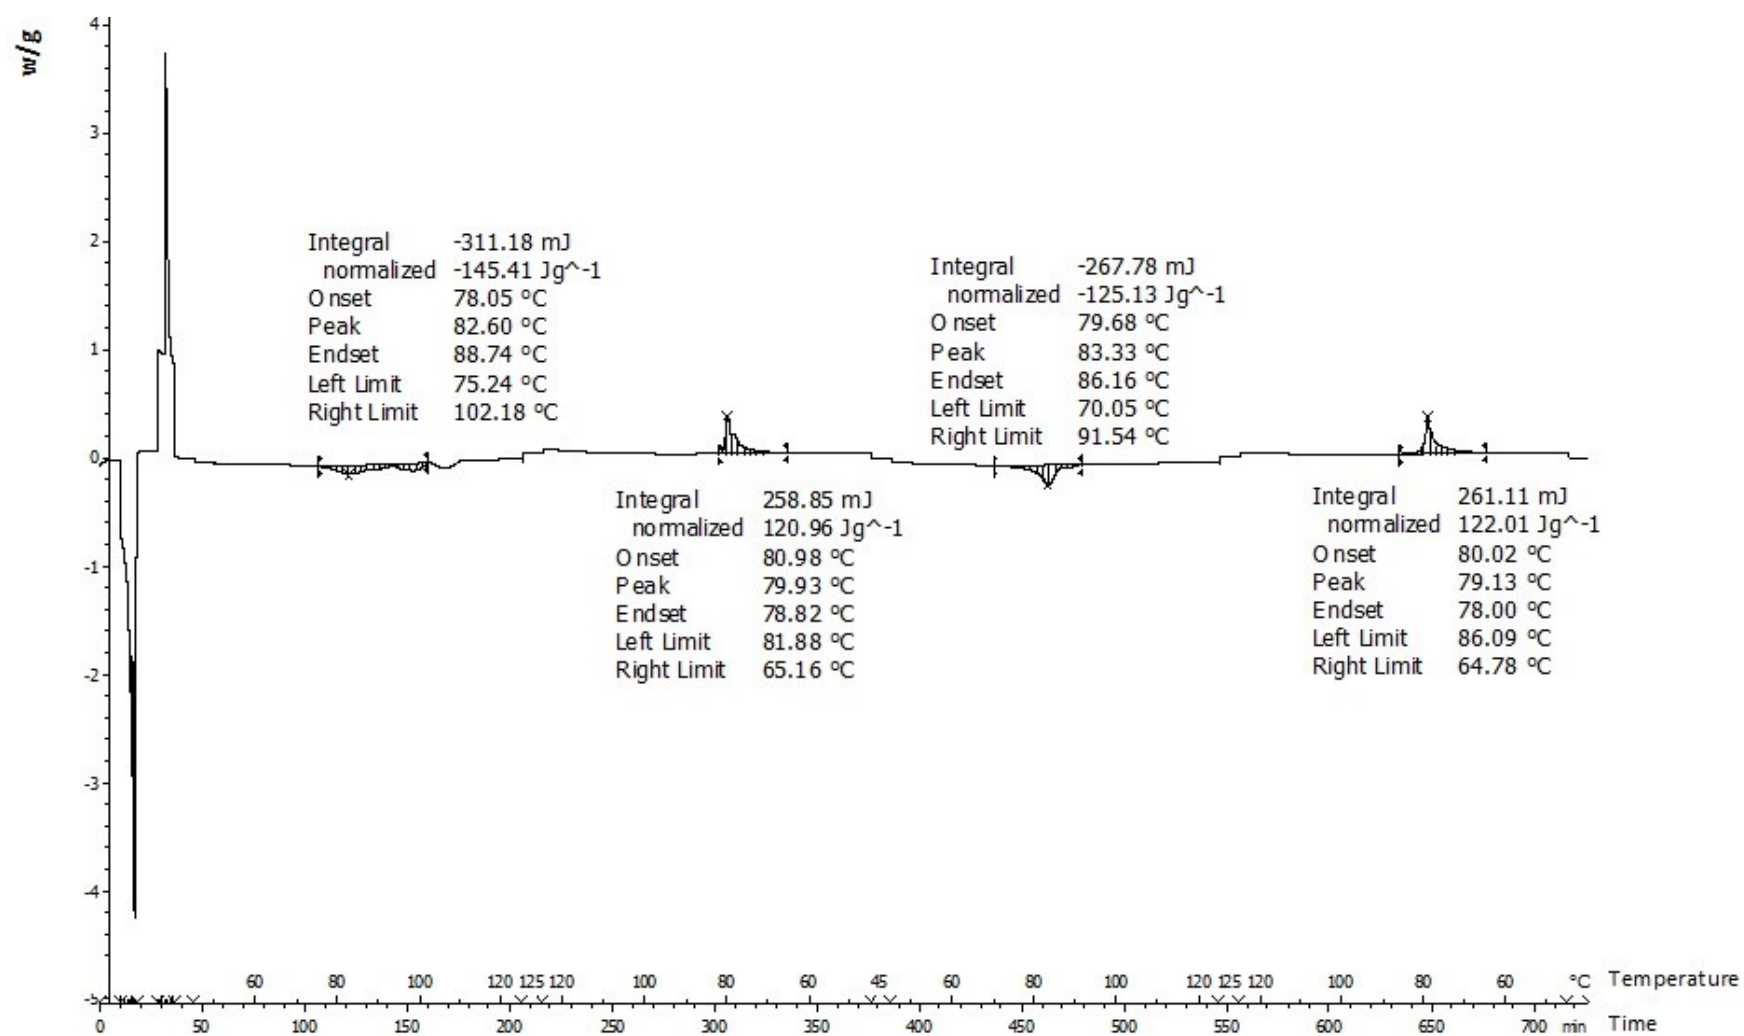

**Figure 7.** DSC response and evaluation of monoamide 2h.

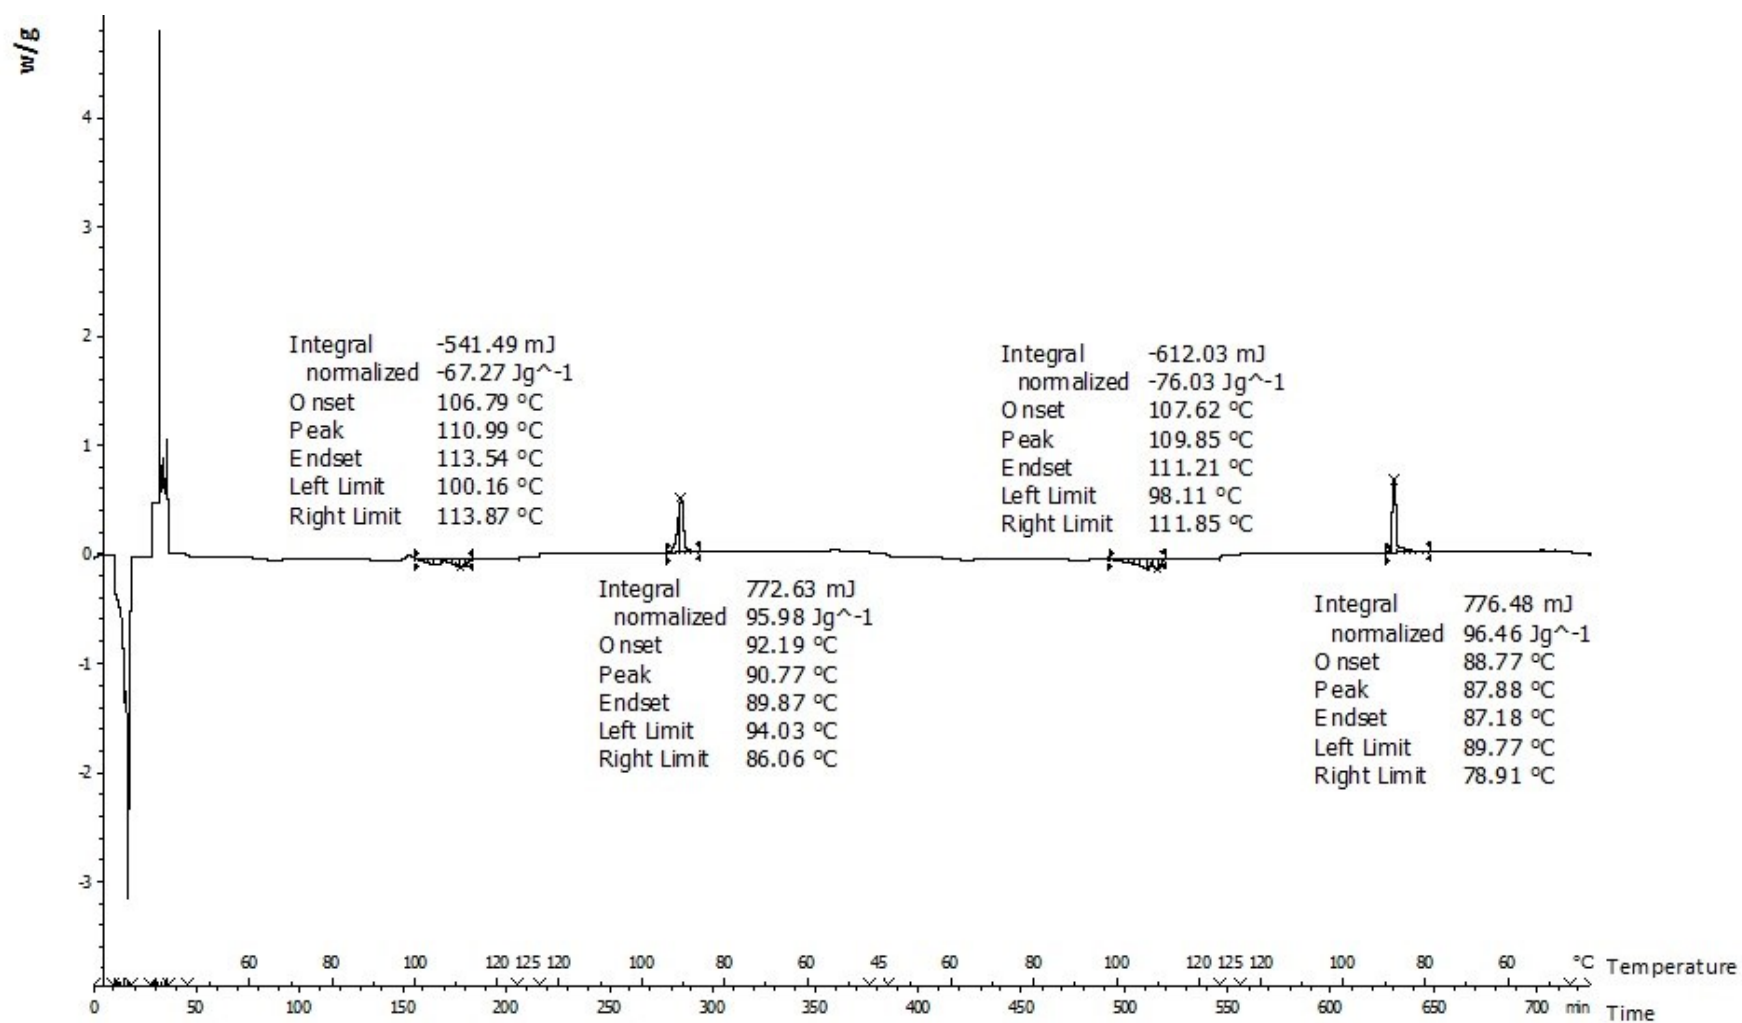

**Figure 8.** DSC response and evaluation of monoamide 2i.

## FT-IR SPECTRA

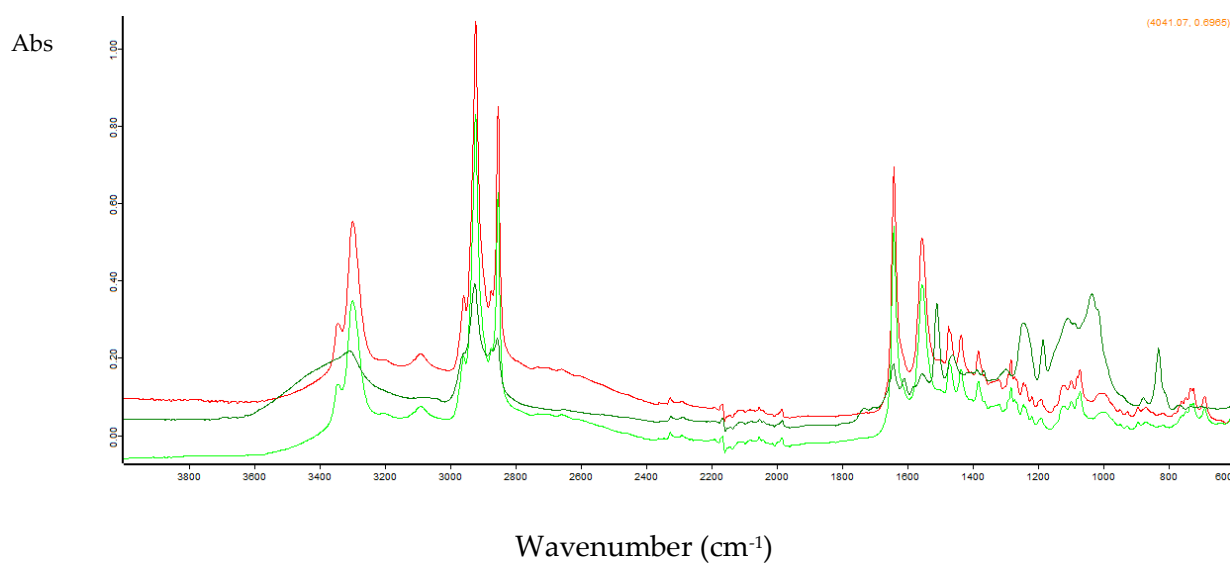

**Figure 9.** FT-IR spectrum of at 40°C, 125°C and 40°C of monoamide **2d** (see color code at the bottom of the last page).

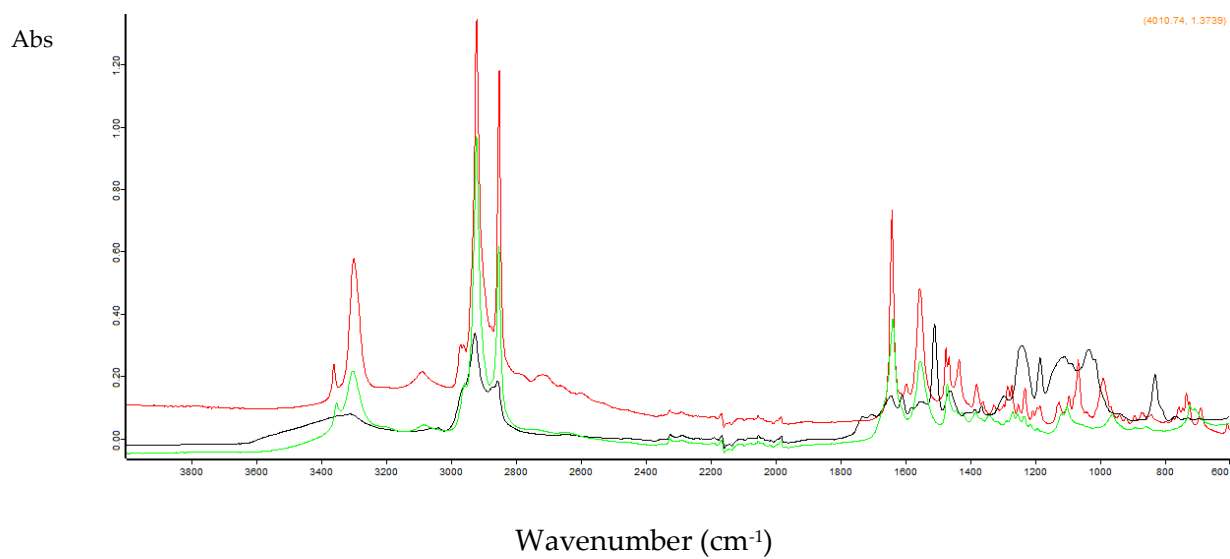

**Figure 9.** FT-IR spectrum of at 40°C, 125°C and 40°C of monoamide **2g** (see color code at the bottom of the last page).

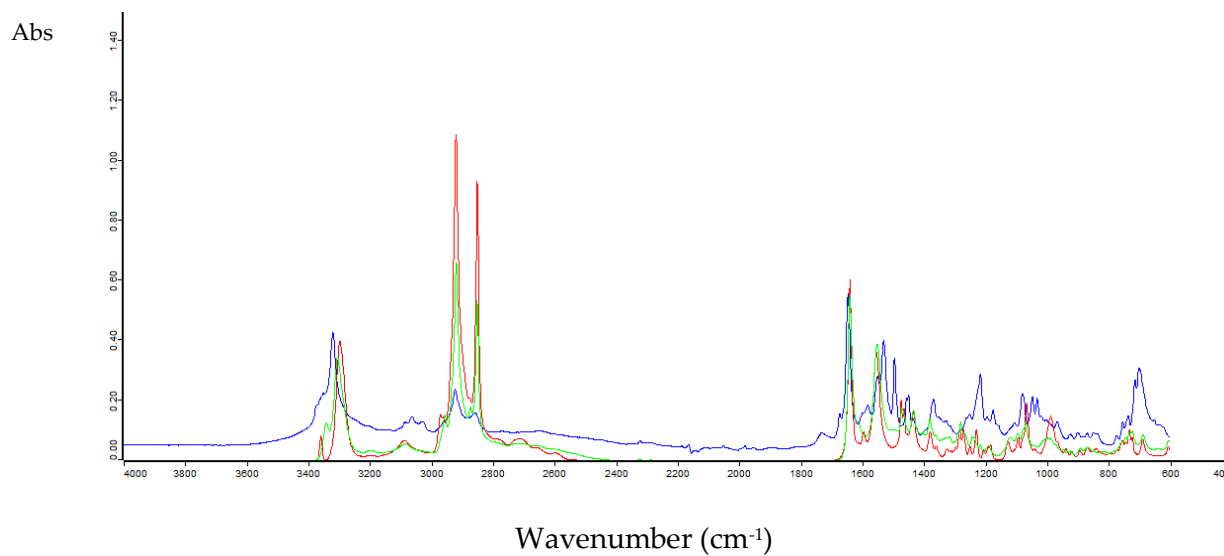

**Figure 9.** FT-IR spectrum of at 40°C, 135°C and 40°C of monoamide **2h** (see color code at the bottom of the last page).

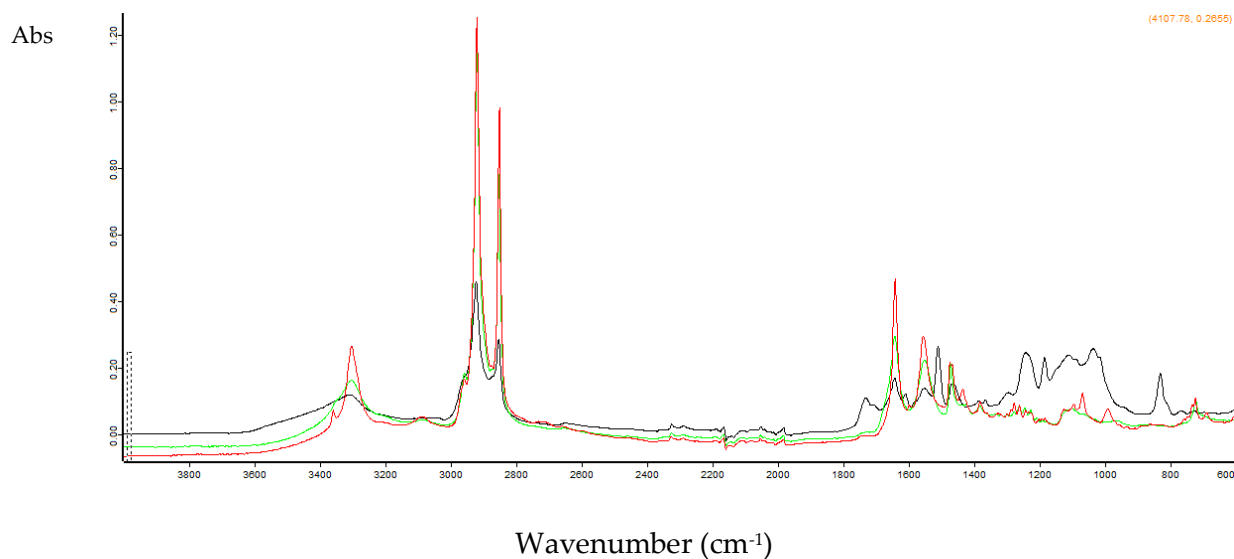

**Figure 9.** FT-IR spectrum of at 40°C, 125°C and 40°C of monoamide **2i** (see color code at the bottom of the last page).

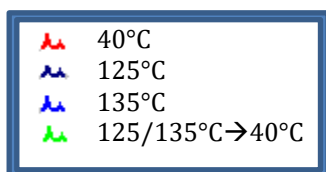

## NMR SPECTRA

**2d**  $^1\text{H}$  NMR (400 MHz,  $\text{CD}_3\text{OD}$ )

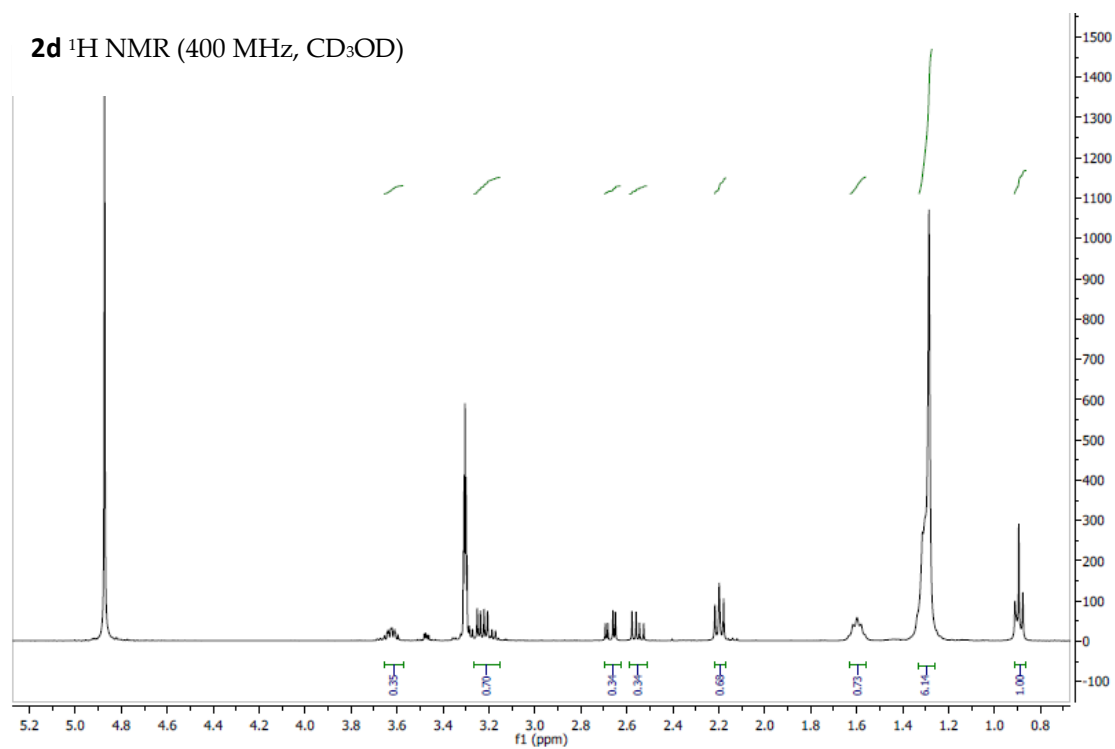

**2d**  $^{13}\text{C}$  NMR (101 MHz,  $\text{CD}_3\text{OD}$ )

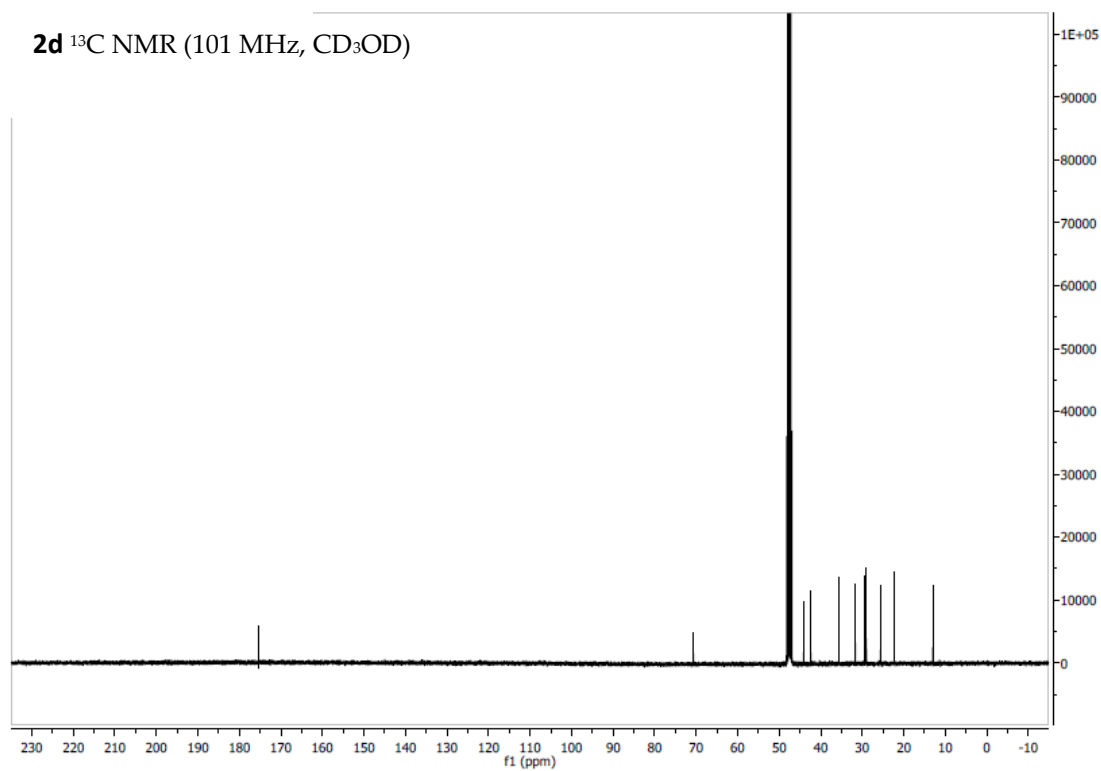

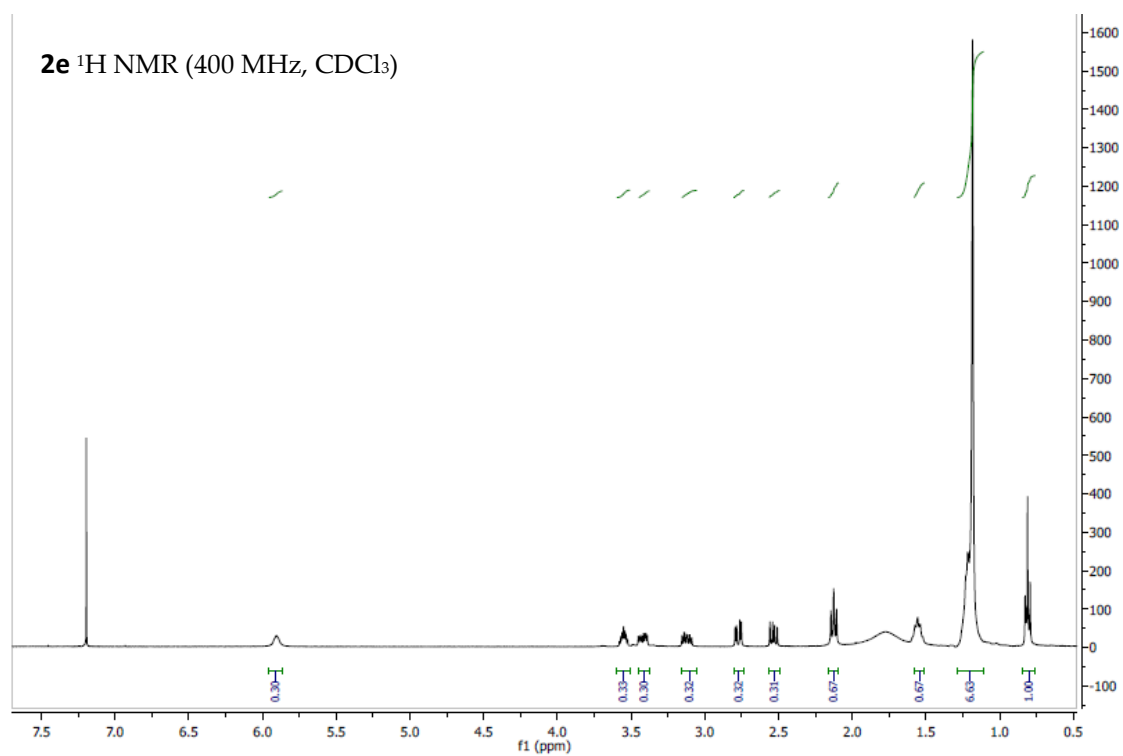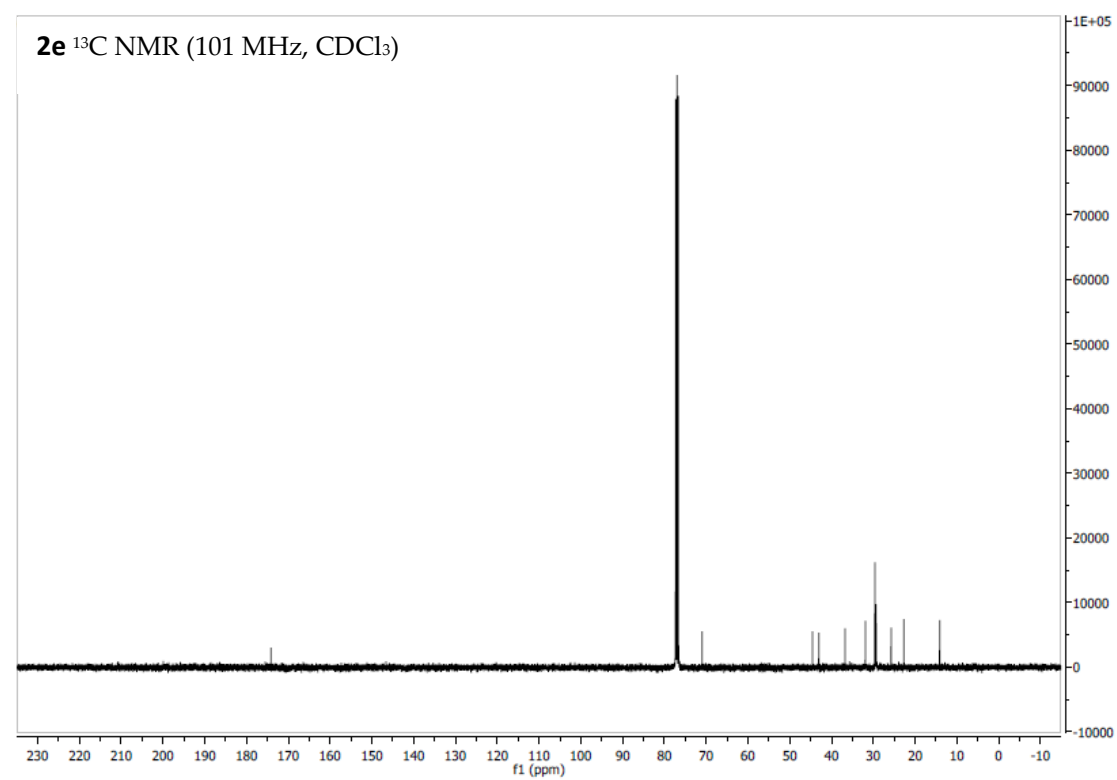

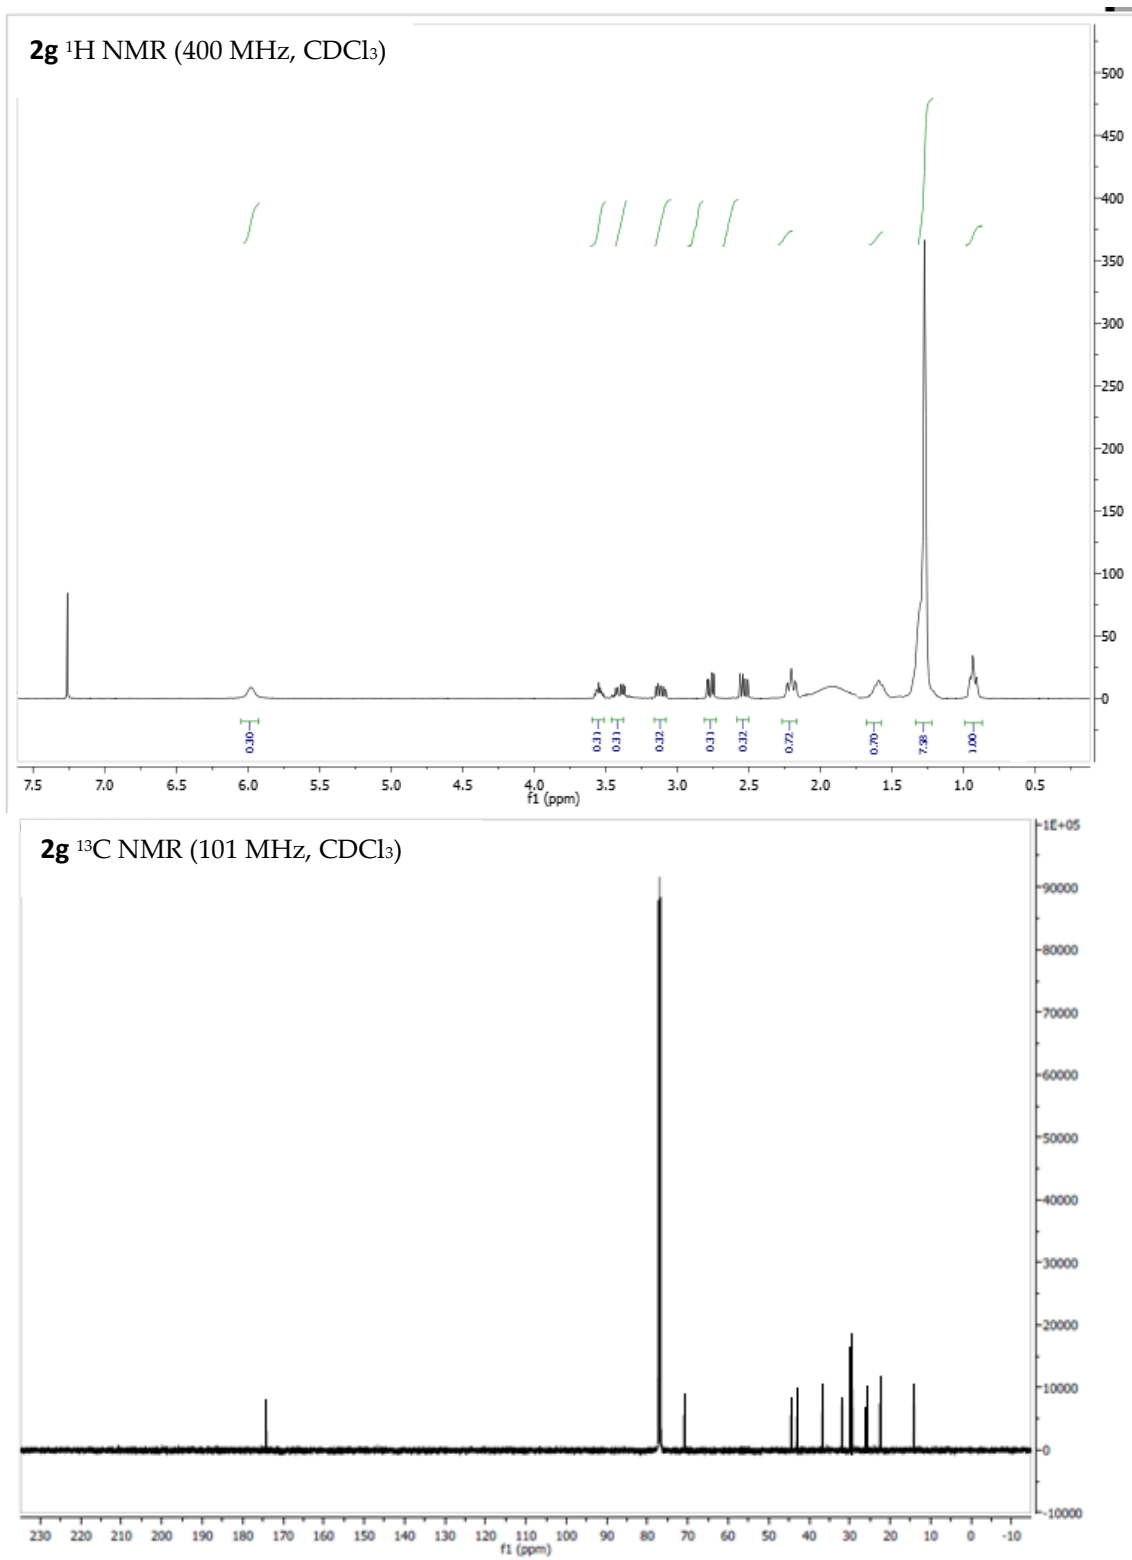

**2h** ( $^1\text{H}$  NMR (400 MHz,  $\text{CD}_3\text{OD}$ ))

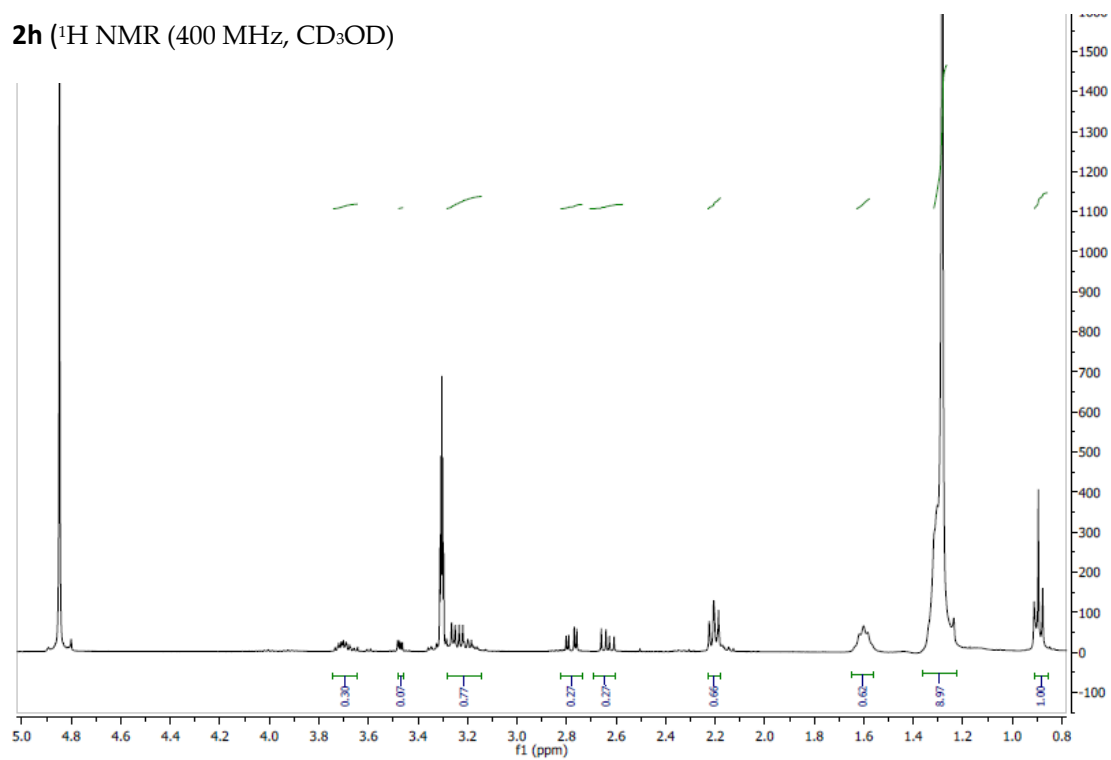

**2h** ( $^{13}\text{C}$  NMR (101 MHz,  $\text{CD}_3\text{OD}$ ))

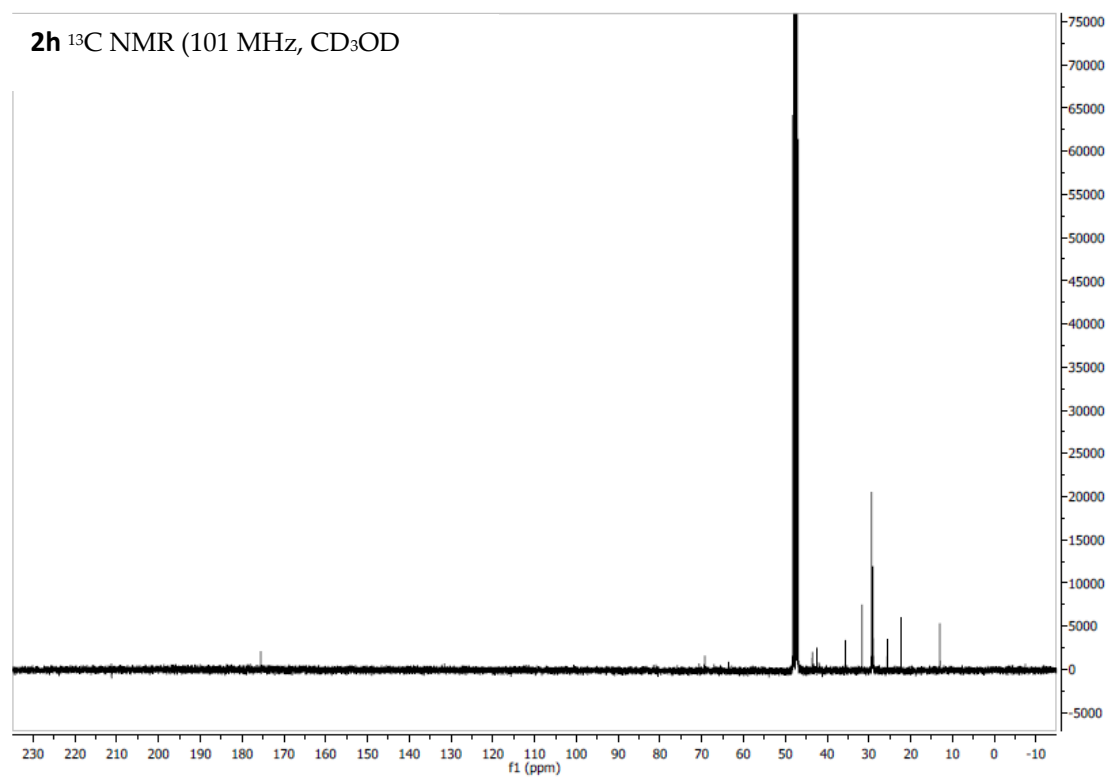



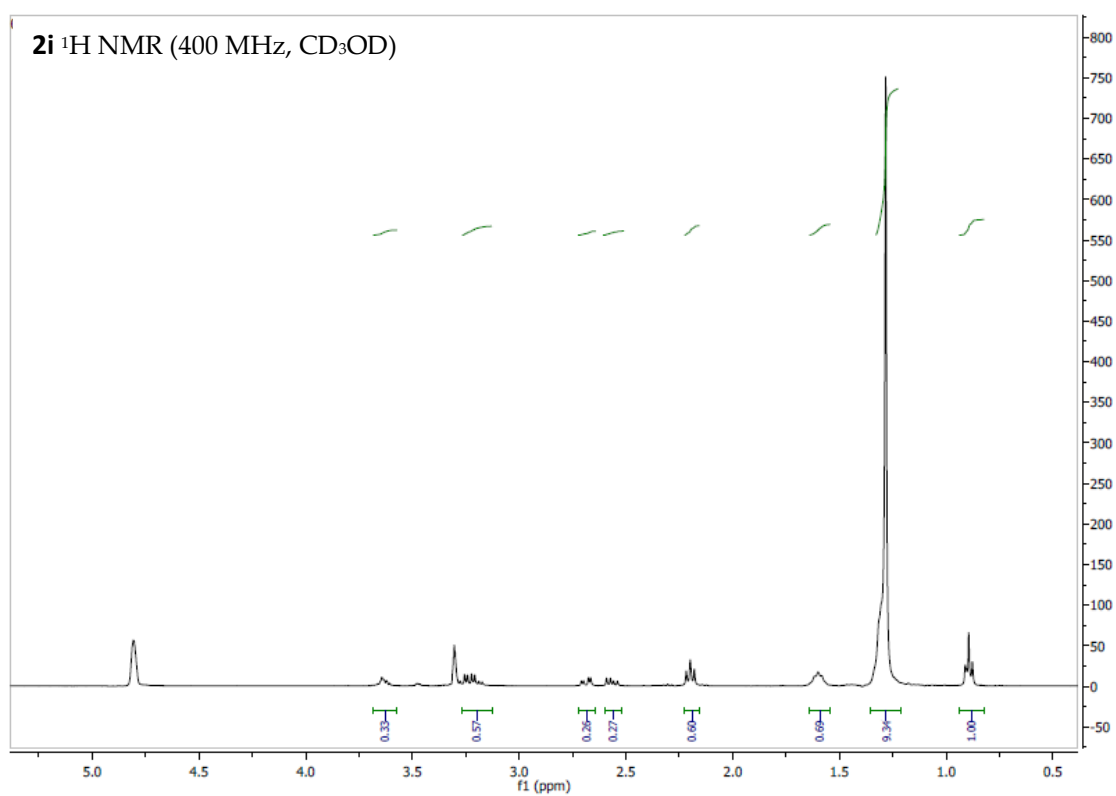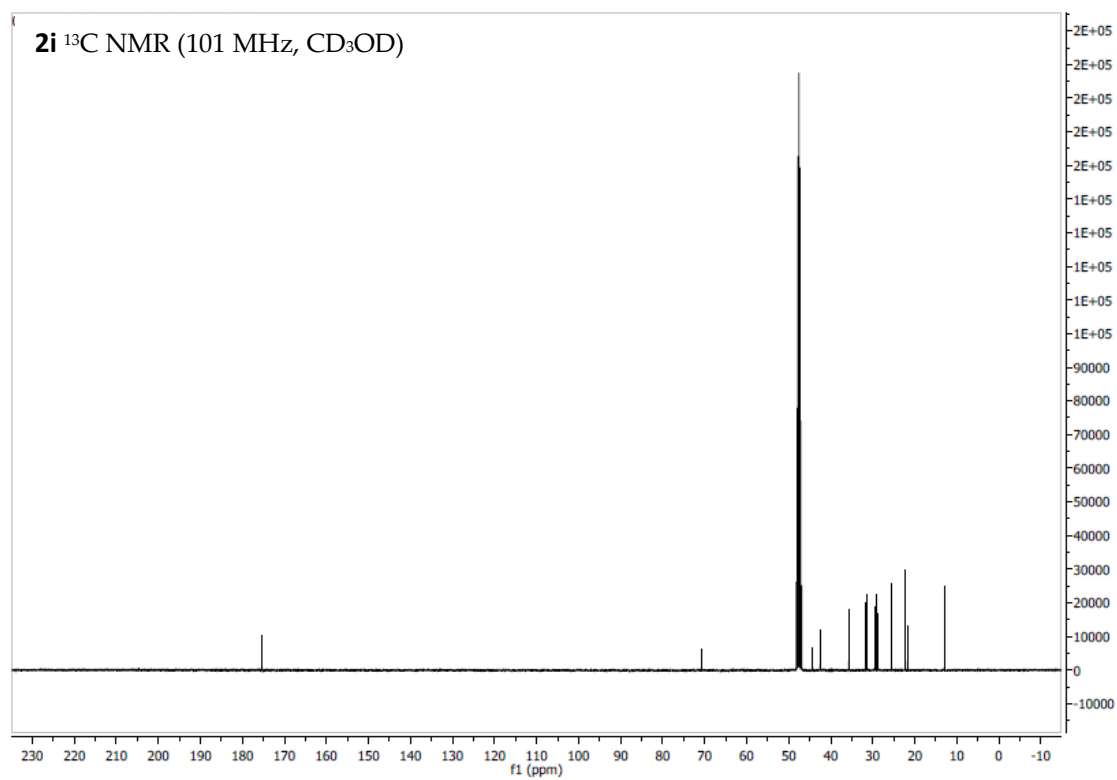

Supplement: s1 [file s1]
